# Supplementary material for: Identifying priority core habitats and corridors for effective conservation of brown bears in Iran
Source: PubMed Central journal article supplement (PMC7806652; doi:10.1038/s41598-020-79970-z), 2021-01-13
Supplement: 41598_2020_79970_MOESM1_ESM.pdf [file 41598_2020_79970_MOESM1_ESM.pdf]

# **Identifying Priority Core Habitats and Corridors for Effective Conservation of Brown Bears in Iran**

**A. Mohammadi<sup>1\*</sup>, K. Almasieh<sup>2</sup>, D. Nayeri<sup>3</sup>, F. Ataei<sup>4</sup>, A. Khani<sup>5</sup>, J. V. López-Bao<sup>6</sup>, V. Penteriani<sup>6</sup>, S. A. Cushman<sup>7</sup>**

*1. Department of Environmental Science and Engineering, Faculty of Natural Resources, University of Jiroft, Jiroft, Iran.*

*2. Department of Nature Engineering, Agricultural Sciences and Natural Resources University of Khuzestan, Mollasani, Iran.*

*3. Department of Environmental Sciences, Faculty of Natural Resources, University of Tehran, Karaj, Iran.*

*4. College of Environment, Karaj, Iran.*

*5. Khorasan-e Razavi Provincial Office of the Department of the Environment, Mashhad, Iran.*

*6. Research Unit of Biodiversity (UMIB, CSIC/UO/PA), 33600 Mieres, Spain.*

*7. USDA Forest Service Rocky Mountain Research Station, 2500 S. Pine Knoll, Flagstaff, AZ, USA.*

**\*Corresponding author: Alireza Mohammadi**

**Email: armohammadi1989@gmail.com**

**Fax: (034)-43347065 Phone: (034)-43347061**

Table S1- Detecting optimal variables for habitat modeling of brown bear based on the maximum of AUC and the minimum of AIC.

|         | Regularization multiplier | AICc    | AUC-test | AUC-diff | Number of selected variables | Selected variables                                                                                                |
|---------|---------------------------|---------|----------|----------|------------------------------|-------------------------------------------------------------------------------------------------------------------|
| Max AUC | 1.5                       | 4845.61 | 0.885    | 0.008    | 8                            | Roughness-BIO1-BIO12-Orchard density- Forest density, Grassland density- Distance to rivers- human footprint      |
| Min AIC | 3                         | 4835.03 | 0.875    | 0.016    | 7                            | Roughness-BIO1-BIO12-Orchard density- Forest density, Grassland density-NDVI, Distance to rivers- human footprint |

Table S2 - Variance inflation factor (VIF) of variables chosen by MaxentVariableSelection in habitat modeling of the brown bear in Iran

| Variables chosen by MaxentVariablesSelection | VIF  |
|----------------------------------------------|------|
| Roughness                                    | 1.29 |
| BIO1                                         | 1.34 |
| BIO12                                        | 1.89 |
| Orchard density                              | 1.03 |
| Forest density                               | 1.76 |
| Grassland density                            | 1.11 |
| NDVI                                         | 2.37 |
| Distance from rivers                         | 1.5  |
| Human footprint                              | 1.46 |

Table S3 - Variable contribution in the habitat modeling of the brown bear in Iran at six spatial scales. Bolded values are the most important variables.

| <b>Spatial scales</b> | <b>Roughness</b> | <b>BIO1</b> | <b>BIO12</b> | <b>Orchard density</b> | <b>Forest density</b> | <b>Grassland density</b> | <b>NDVI</b> | <b>Distance to rivers</b> | <b>Human footprint</b> |
|-----------------------|------------------|-------------|--------------|------------------------|-----------------------|--------------------------|-------------|---------------------------|------------------------|
| 1km                   | <b>25.5</b>      | <b>12</b>   | 6            | 3.2                    | <b>14.1</b>           | 5.2                      | <b>20.2</b> | 7.9                       | 5.9                    |
| 2km                   | <b>25.2</b>      | <b>10.8</b> | 7.6          | 2.1                    | <b>16.4</b>           | 3.2                      | <b>21.3</b> | 8.1                       | 5.3                    |
| 4km                   | <b>23.4</b>      | 6.6         | <b>8.5</b>   | 3.1                    | <b>30.1</b>           | 4.1                      | <b>14.3</b> | 5.6                       | 4.3                    |
| 8km                   | <b>25.2</b>      | 5.2         | <b>8.2</b>   | 2.9                    | <b>30.1</b>           | 3.2                      | <b>13.2</b> | 4.7                       | 7.3                    |
| 16km                  | <b>26.8</b>      | 8           | 5.9          | 3.2                    | <b>28.1</b>           | 3.7                      | <b>11.3</b> | 4.2                       | <b>8.8</b>             |
| 32km                  | <b>19.9</b>      | 6.1         | 5.9          | <b>8.9</b>             | <b>40.1</b>           | 2.4                      | <b>10.1</b> | 3.8                       | 2.8                    |

Table S4 - Core areas and number of different protected area categories inside identified brown bear core habitats in Iran.

| Core number  | Core area       | Number of No-Hunting Areas | Number of Protected Areas | Number of Wildlife Refuges | Number of National Parks |
|--------------|-----------------|----------------------------|---------------------------|----------------------------|--------------------------|
| 1            | 37030.18        | 7                          | 11                        | 0                          | 1                        |
| 2            | 38881.39        | 16                         | 10                        | 0                          | 3                        |
| 3            | 6279.49         | 1                          | 2                         | 0                          | 0                        |
| 4            | 4786.76         | 0                          | 2                         | 0                          | 0                        |
| 5            | 5843            | 0                          | 1                         | 0                          | 0                        |
| 6            | 3028.42         | 0                          | 2                         | 0                          | 0                        |
| 7            | 2120.02         | 0                          | 1                         | 0                          | 0                        |
| 8            | 1393.69         | 1                          | 0                         | 0                          | 0                        |
| 9            | 2161.95         | 0                          | 1                         | 0                          | 0                        |
| 10           | 166.65          | 0                          | 0                         | 0                          | 0                        |
| 11           | 1191.41         | 1                          | 0                         | 0                          | 0                        |
| 12           | 1442.65         | 0                          | 0                         | 0                          | 0                        |
| 13           | 232.81          | 1                          | 0                         | 0                          | 0                        |
| 14           | 1011.83         | 1                          | 0                         | 0                          | 0                        |
| 15           | 124.46          | 1                          | 0                         | 0                          | 0                        |
| <b>Total</b> | <b>23503.65</b> | <b>29</b>                  | <b>30</b>                 | <b>0</b>                   | <b>4</b>                 |

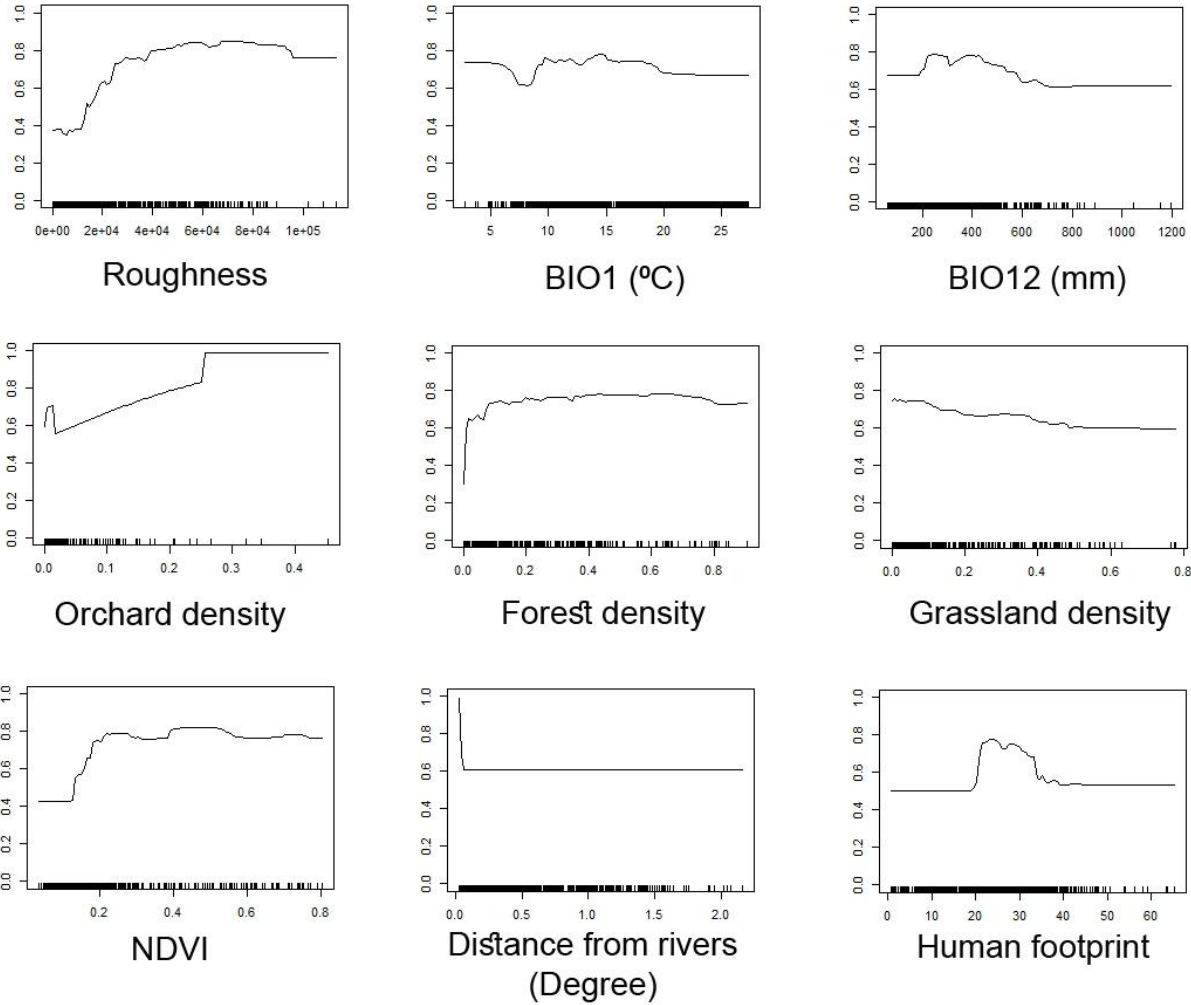

Figure S1-Response curves of presence points to the environmental variables in habitat modeling of the brown bear in Iran.

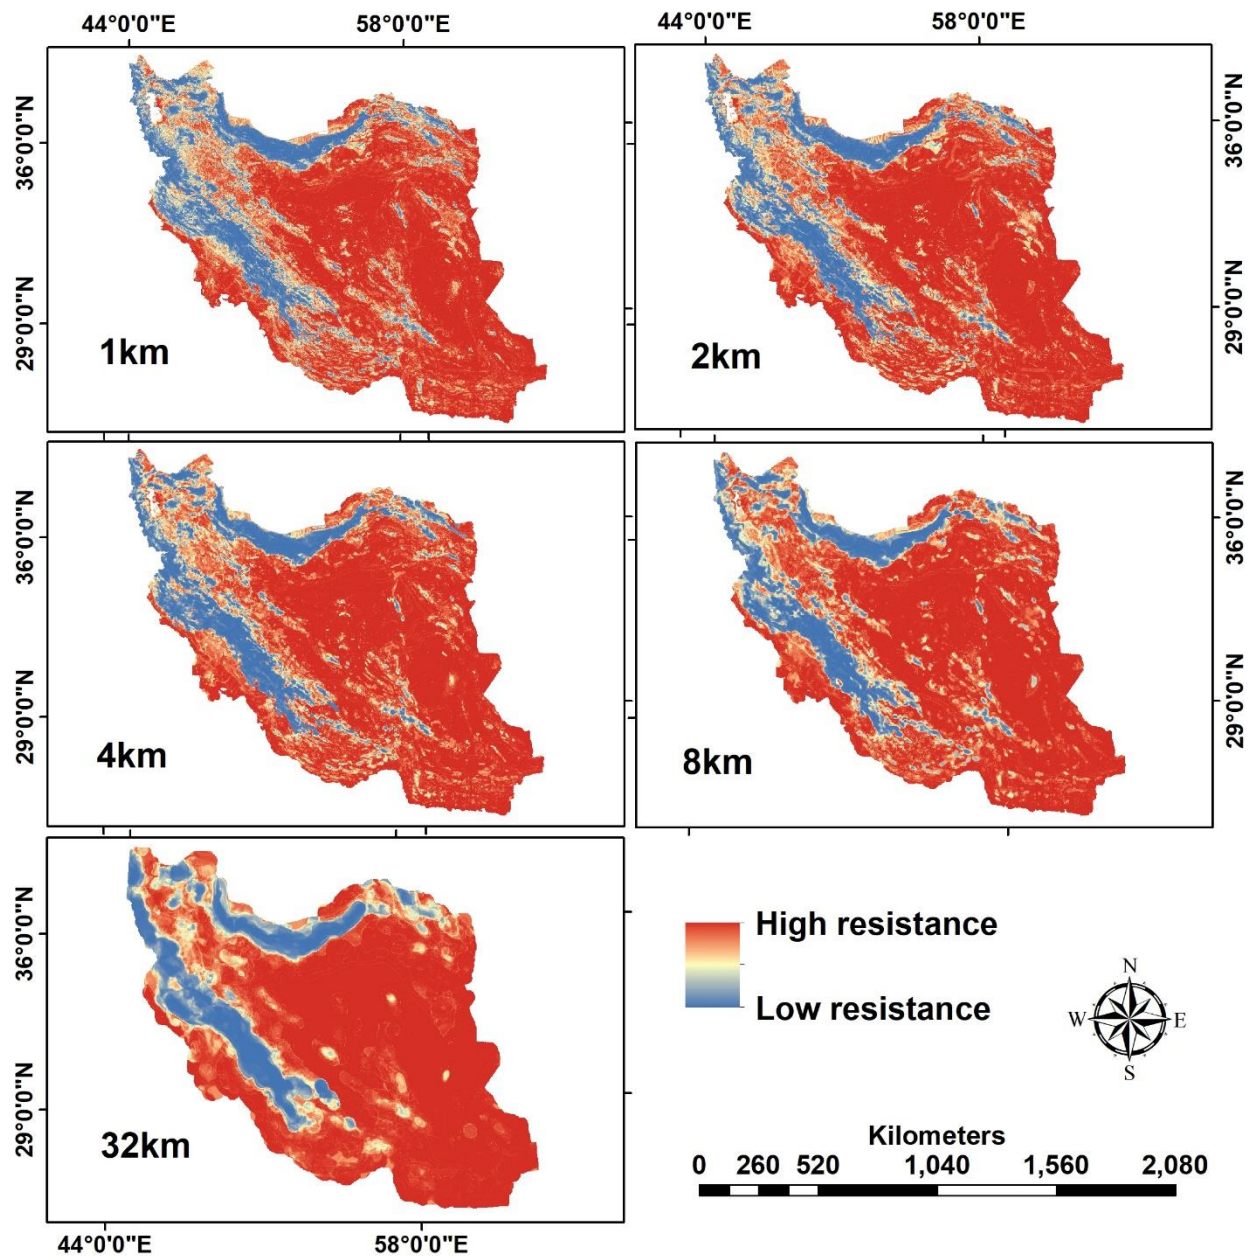

Figure S2 - Resistance maps of the brown bear at five spatial scales in Iran.
